# Supplementary material for: Exploration of bismuth-based materials for photocatalytic decomposition of N2O
Source: Royal Society of Chemistry journal article supplement (doi:10.1039/d4ya00240g), 2024-01-01
Supplement: d4ya00240g1.pdf [file d4ya00240g1.pdf]

## Supplementary Information

### Exploration of bismuth-based materials for photocatalytic decomposition of N<sub>2</sub>O

Shalu Atri,<sup>a\*</sup> Sitharaman Uma,<sup>b</sup> Rajamani Nagarajan,<sup>b</sup> Maros Gregor,<sup>c</sup> Tomas Roch,<sup>c</sup> Miroslava Filip Edelmannova,<sup>d</sup> Martin Reli,<sup>d</sup> Kamila Koci,<sup>d</sup> Martin Motola,<sup>a</sup> Olivier Monfort<sup>a\*</sup>

<sup>a</sup>Comenius University Bratislava, Faculty of Natural Sciences, Department of Inorganic Chemistry, Ilkovicova 6, Mlynska Dolina, 84215 Bratislava, Slovakia

<sup>b</sup>Materials Chemistry Group, Department of Chemistry, University of Delhi, 110007 Delhi, India

<sup>c</sup>Comenius University Bratislava, Faculty of Mathematics Physics and Informatics, Centre for Nanotechnology and Advanced Materials, Mlynska Dolina, 84248 Bratislava, Slovakia

<sup>d</sup>VSB - Technical University of Ostrava, Centre of Energy and Environmental Technologies, Institute of Environmental Technology, 17. listopadu 2172/15, 70800 Ostrava-Poruba, Czechia

\*Correspondence: [shalu1@uniba.sk](mailto:shalu1@uniba.sk) (SA) ; [olivier.monfort@uniba.sk](mailto:olivier.monfort@uniba.sk)

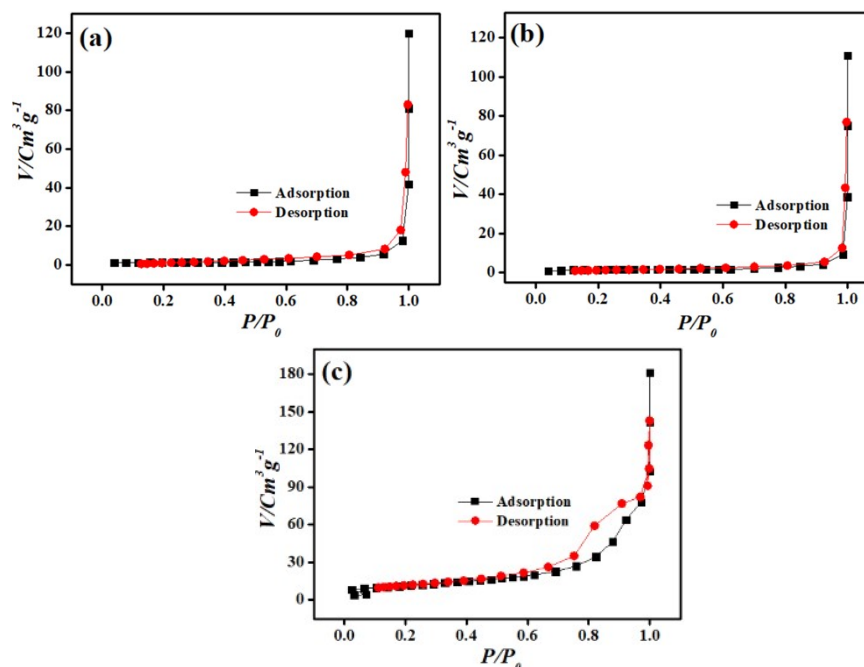

**Fig. S1** N<sub>2</sub> adsorption-desorption BET surface area isotherms of (a) CBOC, (b) CBO, and (c) BCO.

## Supplementary Information

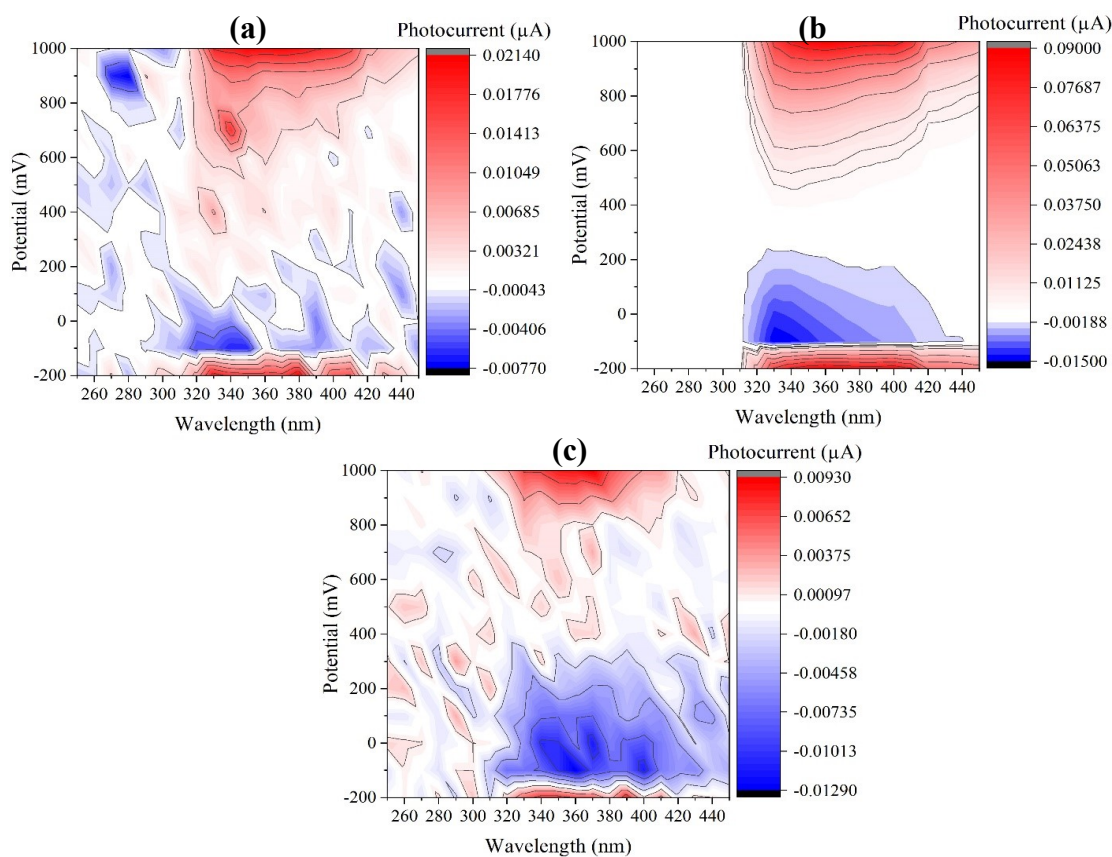

**Fig. S2** Photocurrent generation as a function of potential and wavelength for (a) CBOC, (b) CBO, and (c) BCO.

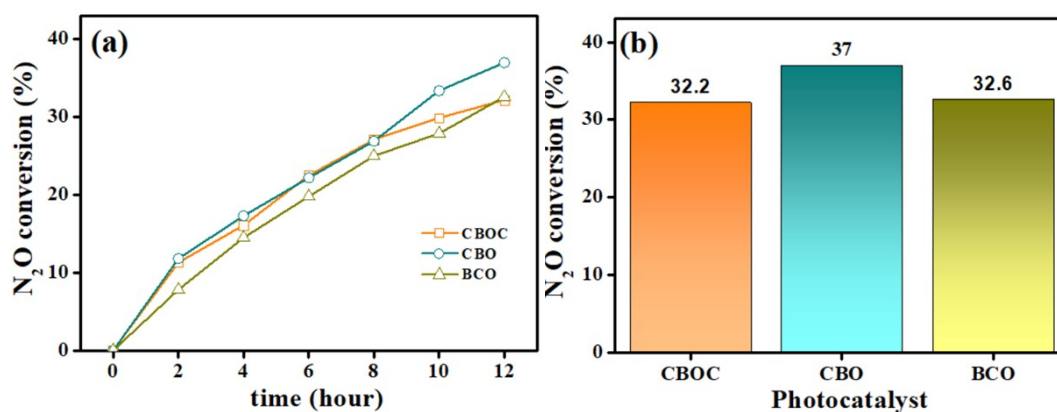

**Fig. S3** (a) Time dependence on the  $\text{N}_2\text{O}$  conversion during the photocatalytic decomposition of  $\text{N}_2\text{O}$  over synthesized CBOC, BCO, and CBO under UV-C irradiation (254 nm). (b) Maximum values of  $\text{N}_2\text{O}$  conversion using CBOC, CBO and BCO after 12 h of UV-C irradiation ( $\lambda_{\text{max}} = 254$ ).

## Supplementary Information

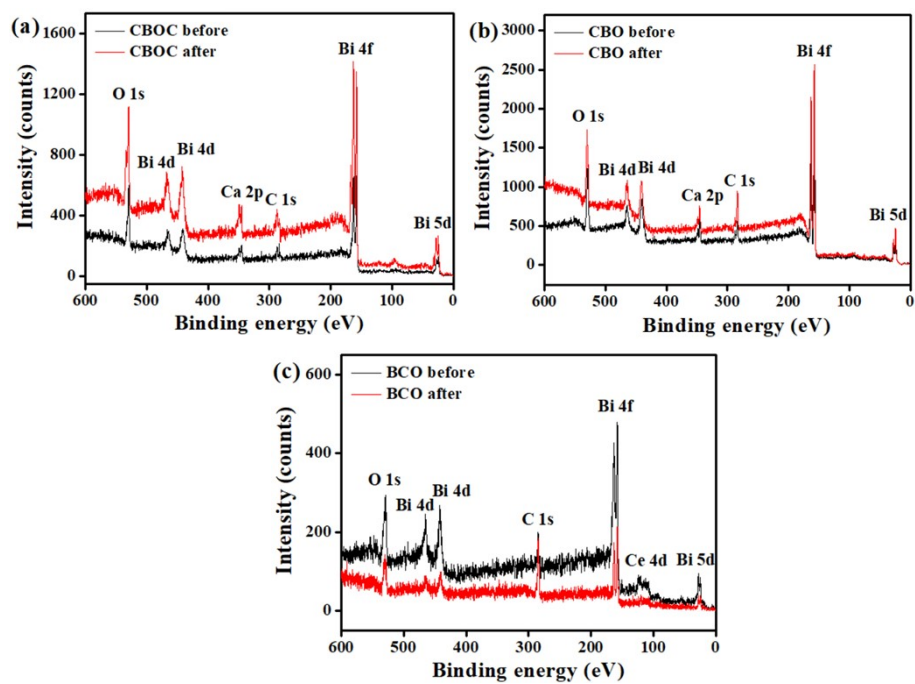

**Fig. S4** XPS wide spectra of CBOC, CBO and BCO before and after  $N_2O$  decomposition.

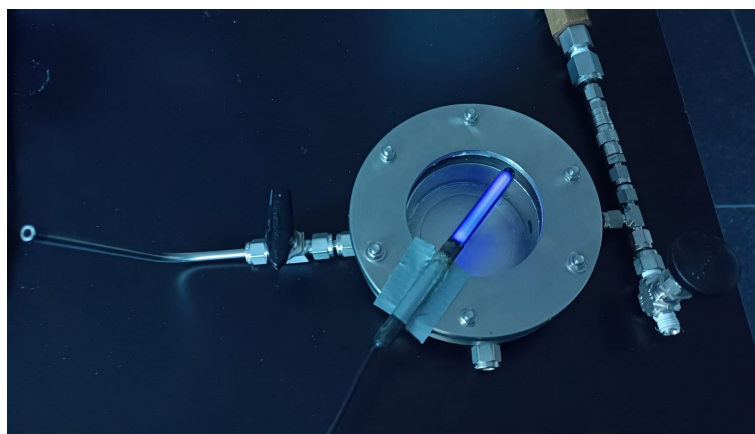

**Fig. S5** The batch photoreactor used for photocatalytic  $N_2O$  decomposition with a 365 nm pen-ray lamp.
